# Supplementary material for: Molecular subtyping of Blastocystis sp. detected in patients at a large tertiary referral hospital in Lusaka, Zambia
Source: Front Parasitol. 2022 Oct 27;1:1033485. doi: 10.3389/fpara.2022.1033485 (PMC11731786; doi:10.3389/fpara.2022.1033485)
Supplement: Supplementary file 3 [file Table_3.xlsx]

## Sheet: Book1
Tables S3: Sequence identity comparison of Zambian Blastocystis isolates sequenced in this study to one another (values shown as percentage)
	ZAM54-2020	ZAM52-2020	ZAM39-2020	ZAM29-2020	ZAM62-2020	ZAM61-2020	ZAM80-2020	ZAM73-2020	ZAM83-2020	ZAM82-2020	ZAM58-2020	ZAM35-2020	ZAM36-2020	ZAM20-2020	ZAM33-2020	ZAM19-2020	ZAM17-2020	ZAM31-2020	ZAM32-2020	ZAM30-2020	ZAM16-2020	ZAM37-2020	ZAM28-2020	ZAM26-2020	ZAM12-2020	ZAM08-2020	ZAM15-2020	ZAM11-2020	ZAM14-2020	ZAM10-2020	ZAM02-020	ZAM05-2020	ZAM09-2020	ZAM01-202	ZAM74-2020	ZAM67-2020	ZAM66-2020	ZAM64-2020	ZAM85-2020	ZAM84-2020 ZAM46-2020 ZAM44-2020 ZAM42-2020 ZAM41-2020 ZAM40-2020
ZAM54-2020	*
ZAM52-2020	42.17	*
ZAM39-2020	42.54	99.82	*
ZAM29-2020	42.44	99.31	99.49	*
ZAM62-2020	42.34	99.65	99.82	99.31	*
ZAM61-2020	98.98	41.66	42.03	41.93	41.83	*
ZAM80-2020	98.98	42.17	42.54	42.44	42.34	98.47	*
ZAM73-2020	99.64	42.9	43.08	43.08	43.08	98.75	99.11	*
ZAM83-2020	37.62	38.65	38.48	38.31	38.48	37.11	37.8	38.47	*
ZAM82-2020	44.93	43.7	43.72	43.46	43.7	44.25	44.42	45.39	41.06	*
ZAM58-2020	42.61	99.14	99.32	99.83	99.14	42.1	42.61	43.26	38.31	43.63	*
ZAM35-2020	44.59	44.21	44.23	43.97	44.21	43.91	44.08	45.21	41.06	99.49	44.14	*
ZAM36-2020	42.44	99.31	99.49	100	99.31	41.93	42.44	43.08	38.31	43.46	99.83	43.97	*
ZAM20-2020	42.27	100	99.83	99.32	99.65	41.76	42.27	42.9	38.65	43.8	99.15	44.31	99.32	*
ZAM33-2020	42.27	100	99.83	99.32	99.65	41.76	42.27	42.9	38.65	43.8	99.15	44.31	99.32	100	*
ZAM19-2020	42.34	99.82	100	99.48	99.82	41.83	42.34	43.08	38.48	43.53	99.31	44.04	99.48	99.82	99.82	*
ZAM17-2020	98.82	41.83	42.2	42.1	42	99.15	98.82	99.46	37.45	44.59	42.27	44.25	42.1	41.93	41.93	42	*
ZAM31-2020	99.49	42.34	42.71	42.61	42.51	98.81	99.15	99.82	37.8	44.76	42.78	44.42	42.61	42.44	42.44	42.51	99.15	*
ZAM32-2020	44.85	43.87	43.89	43.63	43.87	44.08	44.35	45.39	41.06	99.83	43.8	99.66	43.63	43.97	43.97	43.7	44.51	44.68	*
ZAM30-2020	99.49	42.17	42.54	42.44	42.34	98.81	98.98	100	37.62	44.93	42.61	44.59	42.44	42.27	42.27	42.34	99.32	99.83	44.85	*
ZAM16-2020	42.34	99.82	100	99.48	99.82	41.83	42.34	43.08	38.48	43.53	99.31	44.04	99.48	99.82	99.82	100	42	42.51	43.7	42.34	*
ZAM37-2020	45.25	44.9	44.72	44.54	44.9	44.72	45.08	45.43	41.86	99.82	44.72	99.46	44.54	44.9	44.9	44.72	45.25	45.25	99.82	45.43	44.72	*
ZAM28-2020	43.06	100	99.81	99.45	99.81	42.52	43.24	43.06	39.45	45.4	99.27	45.76	99.45	100	100	99.81	42.88	43.24	45.4	43.06	99.81	45.22	*
ZAM26-2020	44.94	44.04	44.06	43.8	44.04	44.08	44.44	45.21	41.06	99.66	43.97	99.83	43.8	44.14	44.14	43.87	44.61	44.78	99.49	44.94	43.87	99.46	45.76	*
ZAM12-2020	45.02	43.87	43.89	43.63	43.87	44.25	44.51	45.39	41.06	99.83	43.8	99.66	43.63	43.97	43.97	43.7	44.68	44.85	99.66	45.02	43.7	99.64	45.58	99.83	*
ZAM08-2020	42.95	99.46	99.64	100	99.46	42.42	43.13	42.95	39.21	44.56	99.82	44.91	100	99.46	99.46	99.64	42.78	43.13	44.56	42.95	99.64	44.54	99.45	44.91	44.74	*
ZAM15-2020	42.51	99.14	99.31	99.82	99.14	42	42.51	43.26	38.31	43.53	100	44.04	99.82	99.14	99.14	99.31	42.17	42.68	43.7	42.51	99.31	44.72	99.27	43.87	43.7	99.82	*
ZAM11-2020	99.49	42.17	42.54	42.44	42.34	98.81	98.98	100	37.62	44.93	42.61	44.59	42.44	42.27	42.27	42.34	99.32	99.83	44.85	100	42.34	45.43	43.06	44.94	45.02	42.95	42.51	*
ZAM14-2020	42.17	99.82	99.65	99.48	99.48	41.66	42.17	42.9	38.65	43.7	99.31	44.21	99.48	99.82	99.82	99.65	41.83	42.34	43.87	42.17	99.65	44.9	100	44.04	43.87	99.46	99.31	42.17	*
ZAM10-2020	42.17	99.82	99.82	99.31	99.65	41.66	42.17	42.9	38.48	43.53	99.14	44.04	99.31	99.82	99.82	99.82	41.83	42.34	43.7	42.17	99.82	44.72	99.81	43.87	43.7	99.46	99.14	42.17	99.65	*
ZAM02-020	99.32	42.34	42.71	42.61	42.51	98.98	99.15	99.29	38.14	45.1	42.78	44.76	42.61	42.44	42.44	42.51	98.82	99.15	45.02	99.15	42.51	45.43	43.42	45.11	45.19	43.31	42.68	99.15	42.34	42.34	*
ZAM05-2020	42.85	100	99.82	99.46	99.64	42.32	43.03	42.85	39.64	45	99.28	45.35	99.46	100	100	99.82	42.67	43.03	45	42.85	99.82	44.9	100	45.35	45.17	99.46	99.28	42.85	100	99.82	43.21	*
ZAM09-2020	99.15	42.17	42.54	42.44	42.34	98.81	99.32	99.64	37.8	44.59	42.61	44.25	42.44	42.27	42.27	42.34	98.82	99.49	44.51	99.32	42.34	45.25	43.24	44.44	44.68	43.13	42.51	99.32	42.17	42.17	98.98	43.03	*
ZAM01-202	42.37	99.65	99.66	99.49	99.48	41.86	42.37	42.9	38.48	43.72	99.32	44.23	99.49	99.66	99.66	99.65	42.03	42.54	43.89	42.37	99.65	44.72	99.81	44.06	43.89	99.46	99.31	42.37	99.82	99.82	42.54	99.82	42.37	*
ZAM74-2020	42.34	99.31	99.48	100	99.31	41.83	42.34	43.08	38.31	43.36	99.82	43.87	100	99.31	99.31	99.48	42	42.51	43.53	42.34	99.48	44.54	99.45	43.7	43.53	100	99.82	42.34	99.48	99.31	42.51	99.46	42.34	99.48	*
ZAM67-2020	99.32	42	42.37	42.27	42.17	98.64	99.15	100	37.62	44.76	42.44	44.42	42.27	42.1	42.1	42.17	99.49	99.66	44.68	99.83	42.17	45.43	43.06	44.68	44.85	42.95	42.34	99.83	42	42	98.98	42.85	99.66	42.2	42.17	*
ZAM66-2020	99.11	42.73	42.9	42.9	42.9	99.29	98.75	99.46	38.29	45.21	43.08	45.03	42.9	42.73	42.73	42.9	100	99.29	45.21	99.46	42.9	45.25	42.88	45.03	45.21	42.78	43.08	99.46	42.73	42.73	99.11	42.67	99.11	42.73	42.9	99.46	*
ZAM64-2020	42.34	99.31	99.48	100	99.31	41.83	42.34	43.08	38.31	43.36	99.82	43.87	100	99.31	99.31	99.48	42	42.51	43.53	42.34	99.48	44.54	99.45	43.7	43.53	100	99.82	42.34	99.48	99.31	42.51	99.46	42.34	99.48	100	42.17	42.9	*
ZAM85-2020	99.64	43.03	43.2	43.2	43.2	99.11	99.47	99.29	38.8	45.14	43.38	44.97	43.2	43.03	43.03	43.2	99.11	99.29	45.14	99.29	43.2	45.43	43.42	44.97	45.14	43.31	43.38	99.29	43.03	43.03	100	43.21	99.47	43.03	43.2	99.29	99.11	43.2	*
ZAM84-2020	42.44	99.31	99.49	100	99.31	41.93	42.44	43.08	38.31	43.46	99.83	43.97	100	99.32	99.32	99.48	42.1	42.61	43.63	42.44	99.48	44.54	99.45	43.8	43.63	100	99.82	42.44	99.48	99.31	42.61	99.46	42.44	99.49	100	42.27	42.9	100	43.2	*
ZAM46-2020	42.34	99.82	100	99.48	99.82	41.83	42.34	43.08	38.48	43.53	99.31	44.04	99.48	99.82	99.82	100	42	42.51	43.7	42.34	100	44.72	99.81	43.87	43.7	99.64	99.31	42.34	99.65	99.82	42.51	99.82	42.34	99.65	99.48	42.17	42.9	99.48	43.2	99.48 *
ZAM44-2020	42.17	100	99.82	99.31	99.65	41.66	42.17	42.9	38.65	43.7	99.14	44.21	99.31	100	100	99.82	41.83	42.34	43.87	42.17	99.82	44.9	100	44.04	43.87	99.46	99.14	42.17	99.82	99.82	42.34	100	42.17	99.65	99.31	42	42.73	99.31	43.03	99.31 99.82 *
ZAM42-2020	45.45	43.7	44.06	43.8	44.04	44.59	44.94	45.74	40.89	98.98	43.97	98.64	43.8	43.8	43.8	43.87	45.11	45.28	98.81	45.45	43.87	98.74	45.4	98.82	98.98	44.91	43.87	45.45	43.7	43.7	45.62	45	44.94	43.89	43.7	45.19	45.56	43.7	45.5	43.80 43.87 43.70 *
ZAM41-2020	42.44	99.65	99.83	99.66	99.65	41.93	42.44	43.08	38.48	43.63	99.49	44.14	99.66	99.66	99.66	99.82	42.1	42.61	43.8	42.44	99.82	44.72	99.81	43.97	43.8	99.64	99.48	42.44	99.82	99.65	42.61	99.82	42.44	99.83	99.65	42.27	42.9	99.65	43.2	99.66 99.82 99.65 43.97 *
ZAM40-2020	42.27	99.82	99.83	99.32	99.65	41.76	42.27	42.9	38.48	43.63	99.15	44.14	99.32	99.83	99.83	99.82	41.93	42.44	43.8	42.27	99.82	44.72	99.81	43.97	43.8	99.46	99.14	42.27	99.65	100	42.44	99.82	42.27	99.83	99.31	42.1	42.73	99.31	43.03	99.32 99.82 99.82 43.80 99.66 *
